# Supplementary material for: A metabolic reconstruction of Lactobacillus reuteri JCM 1112 and analysis of its potential as a cell factory
Source: PubMed Central journal article supplement (PMC6821008; doi:10.1186/s12934-019-1229-3), 2019-10-29
Supplement: 12934_2019_1229_MOESM7_ESM.pdf [file 12934_2019_1229_MOESM7_ESM.pdf]

## Biomass composition of *L. reuteri*

Protein:DNA:RNA:Lipid:LTA:CPS:PG ratio of biomass is not known for *reuteri*. Lipoteichoic acid (LTA) from *L. lactis* (Oliveira, Nielsen, & Förster, 2005) is used because *L. plantarum* also produces Wall teichoic acid (WTA), which *L. reuteri* and *L. lactis* do not. Peptidoglycan in *L. plantarum* (Teusink et al., 2006) was calculated from *Bacillus cereus*, so here peptidoglycan from *L. lactis* is used. Protein ratio was experimentally measured for *L. reuteri* in this study. Otherwise numbers from *L. plantarum* were used for the macromolecular composition.

| Component         |                | Fraction (% w/w) | Norm Fraction (% w/w) | Molar mass (g mol <sup>-1</sup> ) | Coefficient (mmol gDW <sup>-1</sup> ) | Source                                     |
|-------------------|----------------|------------------|-----------------------|-----------------------------------|---------------------------------------|--------------------------------------------|
| Protein           | PROT_LRE_c     | 35,4%            | 43,0%                 | 129,9                             | 3,311                                 | <i>L. reuteri</i> (This study)             |
| DNA               | DNA_LRE_c      | 1,9%             | 2,3%                  | 309,5                             | 0,075                                 | <i>L. plantarum</i> (Teusink et al., 2006) |
| RNA               | RNA_LRE_c      | 9,0%             | 10,9%                 | 321,6                             | 0,340                                 | <i>L. plantarum</i> (Teusink et al., 2006) |
| Lipids            | LIP_LRE_c      | 6,3%             | 7,7%                  | 795,1                             | 0,096                                 | <i>L. plantarum</i> (Teusink et al., 2006) |
| Lipoteichoic acid | LTAtotal_LRE_c | 8,0%             | 9,7%                  | 5290,4                            | 0,018                                 | <i>L. lactis</i> (Oliveira et al., 2005)   |
| Polysaccharides   | CPS_LRE_c      | 9,9%             | 12,0%                 | 648                               | 0,186                                 | <i>L. plantarum</i> (Teusink et al., 2006) |
| Peptidoglycan     | PGlac2_c       | 11,8%            | 14,3%                 | 992                               | 0,145                                 | <i>L. lactis</i> (Oliveira et al., 2005)   |
| Total             |                | 82,3%            | 100%                  |                                   |                                       |                                            |

0.186 CPS\_LRE\_c + 0.075 DNA\_LRE\_c + 0.096 LIP\_LRE\_c + 0.018 LTAtotal\_LRE\_c + 0.145 PGLac2\_c + 3.311 PROT\_LRE\_c + 0.340 RNA\_LRE\_c + 10.2 atp\_c + 1e-05 btn\_c + 0.0002 coa\_c + 10.2 h2o\_c + 0.0002 nad\_c + 1e-06 pydx5p\_c + 1e-05 thf\_c + 1e-05 thmpp\_c + 0.0002 udcdpd\_c + 0.00001 adeadocbl\_c --> 10.2 adp\_c + 10.2 h\_c + 10.2 pi\_c

Flux through ATPM is fixed at: 0.36 mmol h<sup>-1</sup> gDW<sup>-1</sup> (*L. plantarum* (Teusink et al., 2006))

### Protein

Amino acid composition analyzed following cell pellet hydrolysis (Ansynth).

| Amino Acid | Fraction g/g <sub>total a.a.</sub> | Fraction g/gDW | Fraction g/gDW (only protein) | MW (g/mol) | Fraction mole/gDW | Molar ratio |
|------------|------------------------------------|----------------|-------------------------------|------------|-------------------|-------------|
| Ala        | 10,4%                              | 5,2%           | 0,2%                          | 89,1       | 2,25E-05          | 0,7%*       |
| Arg        | 4,7%                               | 2,4%           | 2,4%                          | 174,2      | 1,35E-04          | 4,1%        |
| Asp + Asn  | 13,4%                              | 6,7%           | 6,7%                          | 132,1      | 5,08E-04          |             |
| Asp        |                                    |                |                               |            |                   | 7,7%        |
| Asn        |                                    |                |                               |            |                   | 7,7%        |
| Cys        | 0,8%                               | 0,4%           | 0,4%                          | 121,2      | 3,15E-05          | 1,0%        |
| Glu + Gln  | 13,8%                              | 6,9%           | 4,8%                          | 146,6      | 3,27E-04          |             |
| Glu        |                                    |                |                               |            |                   | 2,7%*       |

|              |             |              |              |              |                 |             |
|--------------|-------------|--------------|--------------|--------------|-----------------|-------------|
| Gln          |             |              |              |              |                 | 7,1%        |
| Gly          | 5,2%        | 2,6%         | 2,6%         | 75,1         | 3,50E-04        | 10,6%       |
| His          | 2,1%        | 1,1%         | 1,1%         | 155,2        | 6,93E-05        | 2,1%        |
| Ile          | 4,9%        | 2,5%         | 2,5%         | 131,1        | 1,89E-04        | 5,7%        |
| Leu          | 7,3%        | 3,7%         | 3,7%         | 131,1        | 2,81E-04        | 8,5%        |
| Lys          | 9,4%        | 4,7%         | 4,7%         | 146,2        | 3,23E-04        | 9,8%        |
| Met          | 2,7%        | 1,3%         | 1,3%         | 149,2        | 8,93E-05        | 2,7%        |
| Phe          | 3,5%        | 1,8%         | 1,8%         | 165,2        | 1,08E-04        | 3,3%        |
| Pro          | 3,0%        | 1,5%         | 1,5%         | 115,1        | 1,33E-04        | 4,0%        |
| Ser          | 3,8%        | 1,9%         | 1,9%         | 105,1        | 1,80E-04        | 5,4%        |
| Thr          | 5,1%        | 2,5%         | 2,5%         | 119,1        | 2,13E-04        | 6,4%        |
| Trp          | 0,9%        | 0,5%         | 0,5%         | 204,2        | 2,31E-05        | 0,7%        |
| Tyr          | 3,4%        | 1,7%         | 1,7%         | 181,2        | 9,30E-05        | 2,8%        |
| Val          | 5,4%        | 2,7%         | 2,7%         | 117,2        | 2,33E-04        | 7,0%        |
| <b>Total</b> | <b>100%</b> | <b>50,2%</b> | <b>43,0%</b> | <b>129,9</b> | <b>3,31E-03</b> | <b>100%</b> |

\*Glutamate and alanine in lipoteichoic acid and peptidoglycan are subtracted from measured values.

Alanine in lipoteichoic acid:

|                               |               |
|-------------------------------|---------------|
| mmol LTA / gDW                | 0,018         |
| mol alanine / mol LTA         | 15,3          |
| mol alanine in LTA / gDW      | 0,0003        |
| Alanine molar mass (g/mol)    | 89,094        |
| <b>g alanine in LTA / gDW</b> | <b>0,0245</b> |

Alanine in peptidoglycan:

|                               |               |
|-------------------------------|---------------|
| mmol PGLac2 / gDW             | 0,145         |
| mol alanine / mol LTA         | 2             |
| mol alanine in LTA / gDW      | 0,0003        |
| Alanine molar mass (g/mol)    | 89,094        |
| <b>g alanine in LTA / gDW</b> | <b>0,0258</b> |

Glutamate in Peptidoglycan:

|                                 |               |
|---------------------------------|---------------|
| mmol PGLac2 / gDW               | 0,145         |
| mol glutamate / mol LTA         | 1             |
| mol glutamate in LTA / gDW      | 0,0002        |
| Glutamate molar mass (g/mol)    | 147,13        |
| <b>g glutamate in LTA / gDW</b> | <b>0,0213</b> |

**Protein reaction:**

0.306 atp\_c + 2 gtp\_c + 2.306 h2o\_c + 0.0062 alatrna\_c + 0.0412 argtrna\_c + 0.0775 asntrna\_c + 0.0775 asptra\_c + 0.0096 cystrna\_c + 0.0721 glntrna\_c + 0.0189 glutrna\_c + 0.1068 glytrna\_c + 0.0211 histrna\_c + 0.0578 iletrna\_c + 0.0857 leutrna\_c + 0.0986 lysrna\_c + 0.0272 mettrna\_c + 0.0329 phetrna\_c + 0.0404 protrna\_c + 0.0548 sertrna\_c + 0.0650 thrtrna\_c + 0.0070 trptrna\_c +

0.0284 tyrtrna\_c + 0.0711 valtrna\_c --> PROT\_LRE\_c + 0.306 adp\_c + 2.0 gdp\_c + 2.306 h\_c + 2.306 pi\_c + 0.0062 trnaala\_c + 0.0412 trnaarg\_c + 0.0775 trnaasn\_c + 0.0775 trnaasp\_c + 0.0096 trnacys\_c + 0.0910 trnaglu\_c + 0.1068 trnagly\_c + 0.0211 trnahis\_c + 0.0578 trnaile\_c + 0.0857 trnaleu\_c + 0.0986 trnalys\_c + 0.0272 trnamet\_c + 0.0329 trnaphe\_c + 0.0404 trnapro\_c + 0.0548 trnaser\_c + 0.0650 trnathr\_c + 0.0070 trnatrp\_c + 0.0284 trnatyr\_c + 0.0711 trnaval\_c

## DNA

Calculated from JCM1112 genome

| Nucleotide               | Ratio      | MW (g mol <sup>-1</sup> ) | MW * Ratio (g mol <sup>-1</sup> ) |
|--------------------------|------------|---------------------------|-----------------------------------|
| dAMP                     | 0,30560617 | 331,2                     | 101,2                             |
| dTMP                     | 0,30560617 | 304,2                     | 93,0                              |
| dCMP                     | 0,19439383 | 289,2                     | 56,2                              |
| dGMP                     | 0,19439383 | 304,2                     | 59,1                              |
| <b>Average MW of DNA</b> |            |                           | <b>309,5</b>                      |

## DNA reaction:

1.37 atp\_c + 0.310284595735 datp\_c + 0.180906354753 dctp\_c + 0.207484087701 dgtp\_c + 0.301324961811 dttp\_c + 1.37 h2o\_c --> DNA\_LRE\_c + 1.37 adp\_c + 1.37 h\_c + 1.37 pi\_c + ppi\_c

## RNA

Calculated from JCM1112 genome, assuming equal transcription

| Nucleotide               | Ratio      | MW (g mol <sup>-1</sup> ) | MW * Ratio (g mol <sup>-1</sup> ) |
|--------------------------|------------|---------------------------|-----------------------------------|
| AMP                      | 0,31434679 | 329,2                     | 103,5                             |
| UMP                      | 0,29106444 | 306,2                     | 89,1                              |
| CMP                      | 0,18074957 | 305,2                     | 55,2                              |
| GMP                      | 0,21383921 | 345,2                     | 73,8                              |
| <b>Average MW of RNA</b> |            |                           | <b>321,6</b>                      |

## RNA reaction:

0.710810743235 atp\_c + 0.187747387186 ctp\_c + 0.21245220899 gtp\_c + 0.288989660589 utp\_c --> RNA\_LRE\_c + 0.4 adp\_c + 0.4 h\_c + 0.4 pi\_c + ppi\_c

## Lipids (Liu, Hou, Zhang, Zeng, & Qiao, 2014)

| Fatty acid                       | Ratio  | MW (g mol <sup>-1</sup> ) | Formula                                        | MW * Ratio (g mol <sup>-1</sup> ) |
|----------------------------------|--------|---------------------------|------------------------------------------------|-----------------------------------|
| C14:0                            | 0,0687 | 228,38                    | C <sub>14</sub> H <sub>28</sub> O <sub>2</sub> | 15,68971                          |
| C16:0                            | 0,2566 | 256,43                    | C <sub>16</sub> H <sub>32</sub> O <sub>2</sub> | 65,79994                          |
| C16:1                            | 0,0258 | 254,41                    | C <sub>16</sub> H <sub>30</sub> O <sub>2</sub> | 6,563778                          |
| C18:0                            | 0,075  | 284,48                    | C <sub>18</sub> H <sub>36</sub> O <sub>2</sub> | 21,336                            |
| C18:1                            | 0,1591 | 282,47                    | C <sub>18</sub> H <sub>34</sub> O <sub>2</sub> | 44,94098                          |
| C18:2                            | 0,3519 | 280,45                    | C <sub>18</sub> H <sub>32</sub> O <sub>2</sub> | 98,69036                          |
| C18:3                            | 0,0418 | 278,44                    | C <sub>18</sub> H <sub>30</sub> O <sub>2</sub> | 11,63879                          |
| cyc19:0                          | 0,0211 | 296,49                    | C <sub>19</sub> H <sub>36</sub> O <sub>2</sub> | 6,255939                          |
| <b>Average MW of fatty acids</b> |        |                           |                                                | <b>270,9155</b>                   |

## Fatty acids:

agly3p\_LRE\_c + 0.0211 cpcdACP\_c + 0.0258 hdeACP\_c + 0.075 ocdACP\_c + 0.0418 ocdctrACP\_c + 0.3519 ocdcyACP\_c + 0.1591 octeACP\_c + 0.2566 palmACP\_c + 0.0687 tdeACP\_c --> ACP\_c + pa\_LRE\_c

Phospholipids ratio from *L. plantarum* used here, as no *L. reuteri* data was available

| Phospholipid                       | Ratio | MW with average fatty acid (g mol <sup>-1</sup> ) | MW * Ratio (g mol <sup>-1</sup> ) |
|------------------------------------|-------|---------------------------------------------------|-----------------------------------|
| Phosphatidylglycerol               | 0,75  | 751,95                                            | 563,96                            |
| 1-lysyl phosphatidylglycerol       | 0,23  | 882,14                                            | 202,89                            |
| Cardiolipin                        | 0,02  | 1411,81                                           | 28,24                             |
| <b>Average MW of phospholipids</b> |       |                                                   | <b>795,1</b>                      |

**Lipid reaction:**

0.02 clpn\_LRE\_c + 0.23 lyspg\_LRE\_c + 0.75 pg\_LRE\_c --> LIP\_LRE\_c

**Lipoteichoic acid** (Bron, Baarlen, & Kleerebezem, 2011; Kleerebezem et al., 2010; Walter et al., 2007)

20 glycerol phosphate (Gro-P) residues

Gro-P residues were substituted with d-alanyl esters (74-79%, average 76,5%)

Gro-P residues were substituted with glycosyl residues (6%)

| Component                                      | Average molar ratio | Molar mass (g mol <sup>-1</sup> ) |
|------------------------------------------------|---------------------|-----------------------------------|
| Diglycosyl diacylglycerol                      | 1                   | 906,3                             |
| Glycerol phosphate                             | 20                  | 154,0                             |
| D-alanine                                      | 15,3                | 71,1                              |
| D-glucose                                      | 1,2                 | 180,2                             |
| <b>Average molar mass of Lipoteichoic acid</b> |                     | <b>5290,4</b>                     |

**LTA reaction:**

0.175 LTA\_LRE\_c + 0.765 LTAala\_LRE\_c + 0.06 LTAglc\_LRE\_c --> LTAtotal\_LRE\_c

*L. reuteri* does not produce Wall teichoic acid

**Polysaccharides** (Ksonzeková et al., 2016)

Glucan homopolysaccharides (merely glucose units)

D-glucose, 4 units, 162 g mol<sup>-1</sup> per unit → 648 g mol<sup>-1</sup>

**Polysaccharide reaction:**

4.0 h2o\_c + 4.0 udpg\_c <=> CPS\_LRE\_c + 5.0 h\_c + 3.0 udp\_c + ump\_c

**Peptidoglycan**

Assumed the same as *L. plantarum*

**Peptidoglycan reaction:**

uaagmdalac\_c --> PGlac2\_c + udcpd\_c

**Glycogen**

Glycogen in *B. subtilis* biomass was negligible (Dauner & Sauer, 2001; Dauner, Storni, & Sauer, 2001). Assumed the same here.

### **ATP requirements**

No data for *L. reuteri* available. Non-growth associated maintenance (NGAM) assumed the same as *L. plantarum*. Growth associated maintenance (GAM) was calculated by constraining model with experimental uptake- and secretion rates of metabolites, and growth rate of *L. reuteri*.

## Sensitivity analysis

The effect of 50% variation in biomass and energy component coefficients on predicted growth rate was investigated. Growth rate was most sensitive to change in the protein and GAM components of the biomass.

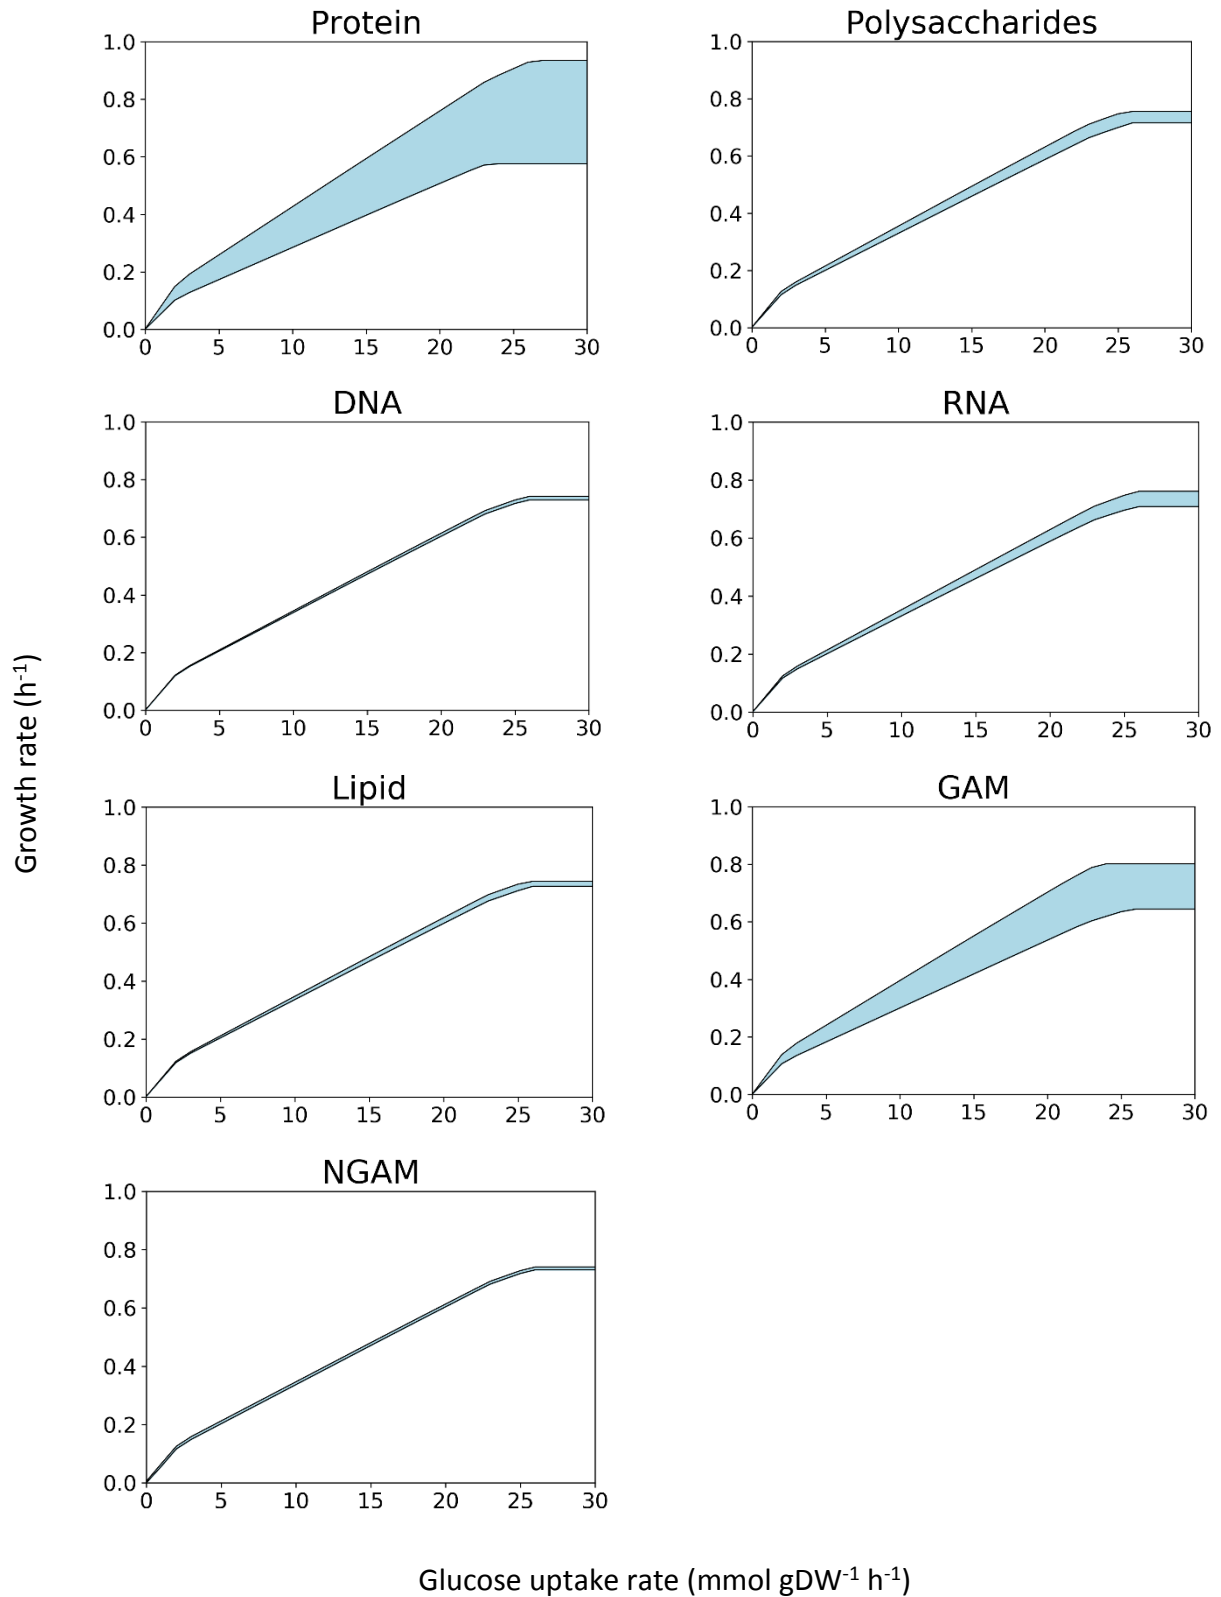

## References

- Bron, P. A., Baarlen, P. Van, & Kleerebezem, M. (2011). Emerging molecular insights into the interaction between probiotics and the host intestinal mucosa. *Nature Reviews Microbiology*, *10*(1), 66–78. <https://doi.org/10.1038/nrmicro2690>
- Dauner, M., & Sauer, U. (2001). Stoichiometric Growth Model for Riboflavin-Producing *Bacillus subtilis*. *Biotechnology and Bioengineering*, *76*(2), 132–143.
- Dauner, M., Storni, T., & Sauer, U. W. E. (2001). *Bacillus subtilis* Metabolism and Energetics in Carbon-Limited and Excess-Carbon Chemostat Culture. *Journal of Bacteriology*, *183*(24), 7308–7317. <https://doi.org/10.1128/JB.183.24.7308>
- Kleerebezem, M., Hols, P., Bernard, E., Rolain, T., Zhou, M., Roland, J., & Bron, P. A. (2010). The extracellular biology of the lactobacilli. *FEMS Microbiology Reviews*, *34*, 199–230. <https://doi.org/10.1111/j.1574-6976.2009.00208.x>
- Ksonzeková, P., Bystricky, P., Vlcková, S., Pätoprst, V., Pulzová, L., Mudronová, D., ... Tkáčiková, L. (2016). Exopolysaccharides of *Lactobacillus reuteri*: Their influence on adherence of *E. coli* to epithelial cells and inflammatory response. *Carbohydrate Polymers*, *141*, 10–19. <https://doi.org/10.1016/j.carbpol.2015.12.037>
- Liu, X. T., Hou, C. L., Zhang, J., Zeng, X. F., & Qiao, S. Y. (2014). Fermentation conditions influence the fatty acid composition of the membranes of *Lactobacillus reuteri* I5007 and its survival following freeze-drying. *Letters in Applied Microbiology*, *59*, 398–403. <https://doi.org/10.1111/lam.12292>
- Oliveira, A. P., Nielsen, J., & Förster, J. (2005). Modeling *Lactococcus lactis* using a genome-scale flux model. *BMC Microbiology*, *5*(1). <https://doi.org/10.1186/1471-2180-5-39>
- Teusink, B., Wiersma, A., Molenaar, D., Francke, C., De Vos, W. M., Siezen, R. J., & Smid, E. J. (2006). Analysis of growth of *Lactobacillus plantarum* WCFS1 on a complex medium using a genome-scale metabolic model. *Journal of Biological Chemistry*, *281*(52), 40041–40048. <https://doi.org/10.1074/jbc.M606263200>
- Walter, J., Loach, D. M., Alqumber, M., Rockel, C., Hermann, C., Pfitzenmaier, M., & Tannock, G. W. (2007). D-Alanyl ester depletion of teichoic acids in *Lactobacillus reuteri* 100-23 results in impaired colonization of the mouse gastrointestinal tract. *Environmental Microbiology*, *9*(7), 1750–1760. <https://doi.org/10.1111/j.1462-2920.2007.01292.x>
